# Supplementary material for: Abundance of gut Prevotella at baseline and metabolic response to barley prebiotics
Source: PubMed Central journal article supplement (PMC6689319; doi:10.1007/s00394-018-1788-9), 2018-07-25
Supplement: 394_2018_1788_MOESM2_ESM.pdf [file 394_2018_1788_MOESM2_ESM.pdf]

**Online resource 2** S-FFA and inflammatory marker responses in the microbiota subgroups post the standardized breakfast, following BKB- or WWB intervention

|                                       | WWB  |      | BKB  |      | %Δ <sup>1</sup> |
|---------------------------------------|------|------|------|------|-----------------|
|                                       | Mean | SEM  | Mean | SEM  |                 |
| <i>s-FFA, fasting (mmol/L)</i>        |      |      |      |      |                 |
| HP, n=12                              | 0.49 | 0.06 | 0.48 | 0.06 | -3              |
| LP, n=13                              | 0.45 | 0.04 | 0.51 | 0.05 | 14              |
| HPB, n=8                              | 0.48 | 0.10 | 0.47 | 0.06 | -3              |
| <i>s-FFA, mean 0+180 min (mmol/L)</i> |      |      |      |      |                 |
| HP, n=12                              | 0.36 | 0.04 | 0.38 | 0.06 | 5               |
| LP, n=13                              | 0.38 | 0.03 | 0.41 | 0.04 | 6               |
| HPB, n=8                              | 0.37 | 0.05 | 0.37 | 0.03 | -2              |
| <i>p-IL-6, fasting (pg/mL)</i>        |      |      |      |      |                 |
| HP, n=11                              | 1.68 | 0.28 | 1.65 | 0.24 | -1              |
| LP, n=12                              | 2.09 | 0.36 | 1.95 | 0.17 | -6              |
| HPB, n=8                              | 2.93 | 1.36 | 2.94 | 1.31 | 0               |
| <i>p-IL-6, mean 0-180 min (pg/mL)</i> |      |      |      |      |                 |

|                              |      |      |      |      |    |
|------------------------------|------|------|------|------|----|
| HP, n=11                     | 2.34 | 0.31 | 2.41 | 0.46 | 3  |
| LP, n=12                     | 3.28 | 0.61 | 3.05 | 0.30 | -7 |
| HPB, n=8                     | 3.45 | 1.59 | 3.57 | 1.50 | 3  |
| <i>p-CRP, fasting (mg/L)</i> |      |      |      |      |    |
| HP, n=11                     | 1.13 | 0.30 | 1.21 | 0.33 | 7  |
| LP, n=12                     | 1.84 | 0.58 | 2.03 | 0.53 | 10 |
| HPB, n=8                     | 1.39 | 0.51 | 1.46 | 0.71 | 5  |

---

<sup>1</sup> The percentage change is calculated as the difference from the WWB

BKB, barley kernel bread; WWB, white wheat bread; FFA, free fatty acids; IL, interleukin; CRP, c-reactive protein

Data are presented as mean  $\pm$  SEM
