# Supplementary material for: Abundance of gut Prevotella at baseline and metabolic response to barley prebiotics
Source: Springer Nature journal article supplement (doi:10.1007/s00394-018-1788-9), 2018-07-25
Supplement: MOESM1 [file 15977870]

**Online resource 1** Fasting and postprandial measures of gut hormones and breath hydrogen responses in the microbiota subgroups in the morning following the interventions with BKB or WWB intake

|                                      | WWB  |      | BKB  |      | %Δ <sup>1</sup> |
|--------------------------------------|------|------|------|------|-----------------|
|                                      | Mean | SEM  | Mean | SEM  |                 |
| <i>p-PYY, fasting (ng/mL)</i>        |      |      |      |      |                 |
| HP, n=12                             | 0.62 | 0.04 | 0.69 | 0.04 | <b>11</b> †     |
| LP, n=13                             | 0.60 | 0.03 | 0.64 | 0.04 | 7               |
| HPB, n=8                             | 0.59 | 0.04 | 0.61 | 0.03 | 3               |
| <i>p-PYY, mean 0-180 min (ng/mL)</i> |      |      |      |      |                 |
| HP, n=12                             | 0.65 | 0.04 | 0.70 | 0.05 | <b>9</b> ‡      |
| LP, n=13                             | 0.63 | 0.03 | 0.66 | 0.04 | 5               |
| HPB, n=8                             | 0.58 | 0.04 | 0.62 | 0.03 | 6               |
| <i>p-GLP-2, fasting (ng/mL)</i>      |      |      |      |      |                 |
| HP, n=12                             | 14.1 | 1.1  | 14.4 | 0.9  | 2               |
| LP, n=13                             | 13.4 | 1.2  | 13.5 | 1.1  | 0               |
| HPB, n=8                             | 14.1 | 1.2  | 14.3 | 1.3  | 1               |

*p-GLP-2, mean 0-180 min (ng/mL)*

|          |      |     |      |     |           |
|----------|------|-----|------|-----|-----------|
| HP, n=12 | 14.9 | 1.0 | 15.4 | 1.0 | 4         |
| LP, n=13 | 14.3 | 1.2 | 14.5 | 1.2 | 1         |
| HPB, n=8 | 14.6 | 1.1 | 15.4 | 1.2 | <b>6*</b> |

*p-GLP-1, fasting (pmol/L)*

|          |      |      |      |      |    |
|----------|------|------|------|------|----|
| HP, n=12 | 3.06 | 0.64 | 3.09 | 0.68 | 1  |
| LP, n=12 | 2.39 | 0.35 | 2.27 | 0.33 | -5 |
| HPB, n=8 | 2.32 | 0.82 | 2.35 | 0.81 | 1  |

*p-GLP-1, AUC 0-180 min (pmol·min/L)*

|          |       |       |       |       |            |
|----------|-------|-------|-------|-------|------------|
| HP, n=12 | 635.0 | 114.0 | 628.0 | 126.0 | -1         |
| LP, n=12 | 491.5 | 69.2  | 531.7 | 56.9  | 8          |
| HPB, n=8 | 477.0 | 120.0 | 533.0 | 132.0 | <b>12*</b> |

*breath H<sub>2</sub>, fasting (ppm)*

|          |      |     |      |      |              |
|----------|------|-----|------|------|--------------|
| HP, n=12 | 15.4 | 3.4 | 34.5 | 7.5  | <b>124**</b> |
| LP, n=13 | 30.8 | 6.6 | 67.1 | 16.5 | <b>118*</b>  |
| HPB, n=8 | 25.0 | 8.0 | 61.0 | 11.9 | <b>144*</b>  |

*breath H<sub>2</sub>, weighted mean 0-180 min (ppm)*

|          |      |     |      |      |              |
|----------|------|-----|------|------|--------------|
| HP, n=12 | 9.6  | 1.7 | 40.4 | 11.0 | <b>322**</b> |
| LP, n=13 | 17.2 | 4.2 | 57.8 | 12.0 | <b>235**</b> |
| HPB, n=8 | 16.3 | 3.9 | 54.6 | 11.0 | <b>234**</b> |

---

<sup>1</sup> The percentage change is calculated as the difference from the WWB

BKB, barley kernel bread; WWB, white wheat bread; PYY, peptide YY; GLP, glucagon-like peptide; H<sub>2</sub>, hydrogen

\*Different from WWB P < 0.05, \*\*P < 0.01, \*\*\* P < 0.001, †P = 0.050, ‡P = 0.060 (One-way ANOVA)

Data are presented as mean ± SEM
