# Supplementary material for: Abundance of gut Prevotella at baseline and metabolic response to barley prebiotics
Source: Springer Nature journal article supplement (doi:10.1007/s00394-018-1788-9), 2018-07-25
Supplement: MOESM3 [file 15977870]

**Online resource 3** Subjective appetite responses in the microbiota subgroups after the standardized breakfast following the intervention with BKB or WWB intake

|                                             | WWB  |      | BKB  |      | %Δ <sup>1</sup> |
|---------------------------------------------|------|------|------|------|-----------------|
|                                             | Mean | SEM  | Mean | SEM  |                 |
| <i>Hunger, fasting (mm)</i>                 |      |      |      |      |                 |
| HP, n=12                                    | 38.0 | 9.3  | 44.5 | 7.7  | 17              |
| LP, n=12                                    | 56.4 | 6.2  | 40.5 | 9.0  | -28*            |
| HPB, n=8                                    | 36.6 | 8.8  | 37.4 | 8.4  | 2               |
| <i>Hunger, AUC 0-180min (mm·min)</i>        |      |      |      |      |                 |
| HP, n=12                                    | 6335 | 1155 | 5656 | 1083 | -11             |
| LP, n=12                                    | 9613 | 1288 | 8151 | 1320 | -15             |
| HPB, n=8                                    | 5484 | 1184 | 4911 | 1346 | -10             |
| <i>Desire to eat, fasting (mm)</i>          |      |      |      |      |                 |
| HP, n=12                                    | 59.4 | 7.2  | 53.0 | 8.6  | -11             |
| LP, n=12                                    | 64.4 | 6.2  | 53.0 | 8.6  | -18             |
| HPB, n=8                                    | 48.5 | 10.0 | 44.6 | 9.8  | -8              |
| <i>Desire to eat, AUC 0-180min (mm·min)</i> |      |      |      |      |                 |

|          |      |      |      |     |     |
|----------|------|------|------|-----|-----|
| HP, n=12 | 6058 | 1170 | 5476 | 944 | -10 |
|----------|------|------|------|-----|-----|

|          |       |      |      |      |     |
|----------|-------|------|------|------|-----|
| LP, n=12 | 10430 | 1448 | 8815 | 1404 | -15 |
|----------|-------|------|------|------|-----|

|          |      |      |      |      |    |
|----------|------|------|------|------|----|
| HPB, n=8 | 6044 | 1125 | 5808 | 1646 | -4 |
|----------|------|------|------|------|----|

*Satiety, fasting (mm)*

|          |      |      |      |     |    |
|----------|------|------|------|-----|----|
| HP, n=12 | 32.6 | 10.1 | 39.2 | 7.8 | 20 |
|----------|------|------|------|-----|----|

|          |      |     |      |     |      |
|----------|------|-----|------|-----|------|
| LP, n=12 | 28.8 | 5.3 | 55.3 | 8.7 | 92** |
|----------|------|-----|------|-----|------|

|          |      |     |      |      |    |
|----------|------|-----|------|------|----|
| HPB, n=8 | 30.3 | 7.7 | 35.8 | 10.0 | 18 |
|----------|------|-----|------|------|----|

*Satiety, AUC 0-180min (mm·min)*

|          |       |      |      |     |    |
|----------|-------|------|------|-----|----|
| HP, n=12 | 10674 | 1221 | 9999 | 982 | -6 |
|----------|-------|------|------|-----|----|

|          |      |      |       |      |     |
|----------|------|------|-------|------|-----|
| LP, n=12 | 8287 | 1188 | 10184 | 1218 | 23† |
|----------|------|------|-------|------|-----|

|          |      |      |       |      |    |
|----------|------|------|-------|------|----|
| HPB, n=8 | 8988 | 1384 | 10666 | 1304 | 19 |
|----------|------|------|-------|------|----|

---

<sup>1</sup> The percentage change is calculated as the difference from the WWB

BKB, barley kernel bread; WWB, white wheat bread

\* Different from WWB  $P < 0.05$ , \*\* $P < 0.01$ , † $P = 0.065$  (One-way ANOVA)

Data are presented as mean  $\pm$  SEM
